# Supplementary material for: QTL-seq Identifies Pokkali-Derived QTLs and Candidate Genes for Salt Tolerance at Seedling Stage in Rice (Oryza sativa L.)
Source: MDPI journal article supplement (doi:10.3390/agriculture13081596), 2023-08-12
Supplement: s1 [file s1]

## **Supplementary Information**

### **QTL-seq Identifies Pokkali-derived QTLs and Candidate Genes for Salt Tolerance at Seedling Stage in Rice (*Oryza sativa* L.)**

Decha Songtorsesakul, Wanchana Aesomnuk, Sarinthip Pannak, Jonaliza Lanceras Siangliw, Meechai

Siangliw, Theerayut Toojinda, Samart Wanchana\*, Siwaret Arikrit\*

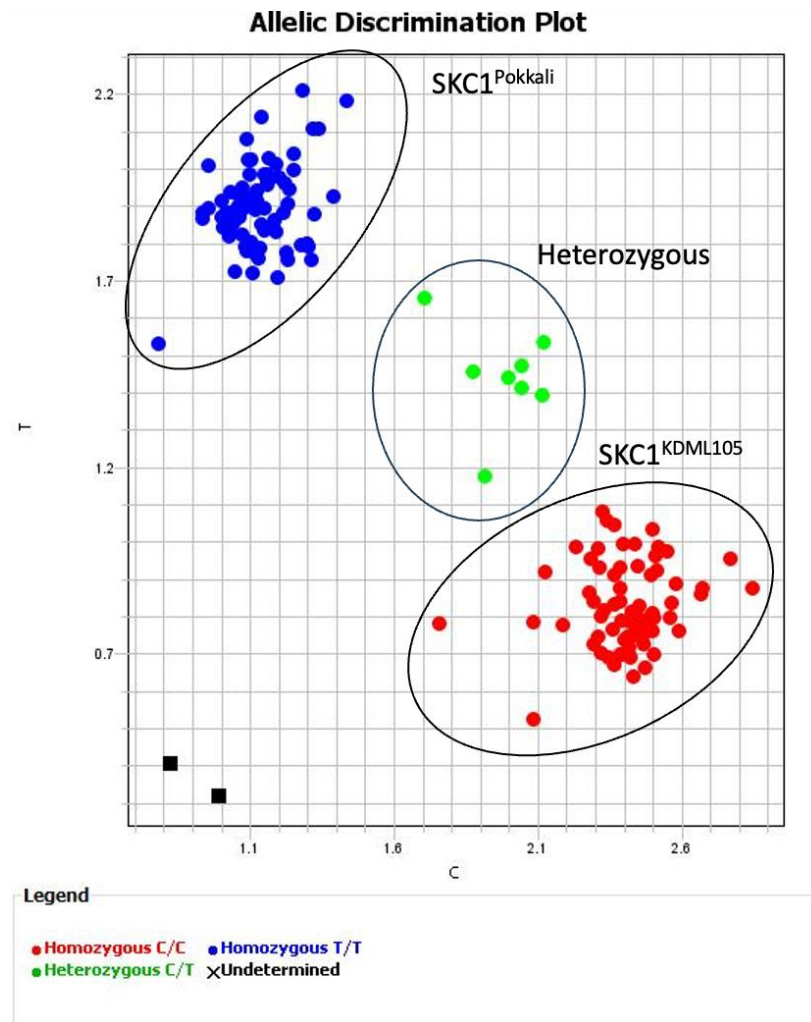

**Figure S1.** Allelic discrimination plots of the PCR results of the SKC1-KASP marker genotyped in the RIL population. Red dots represent the homozygous C/C genotype, blue dots represent the homozygous T/T genotype and green dots represent the heterozygous genotype.

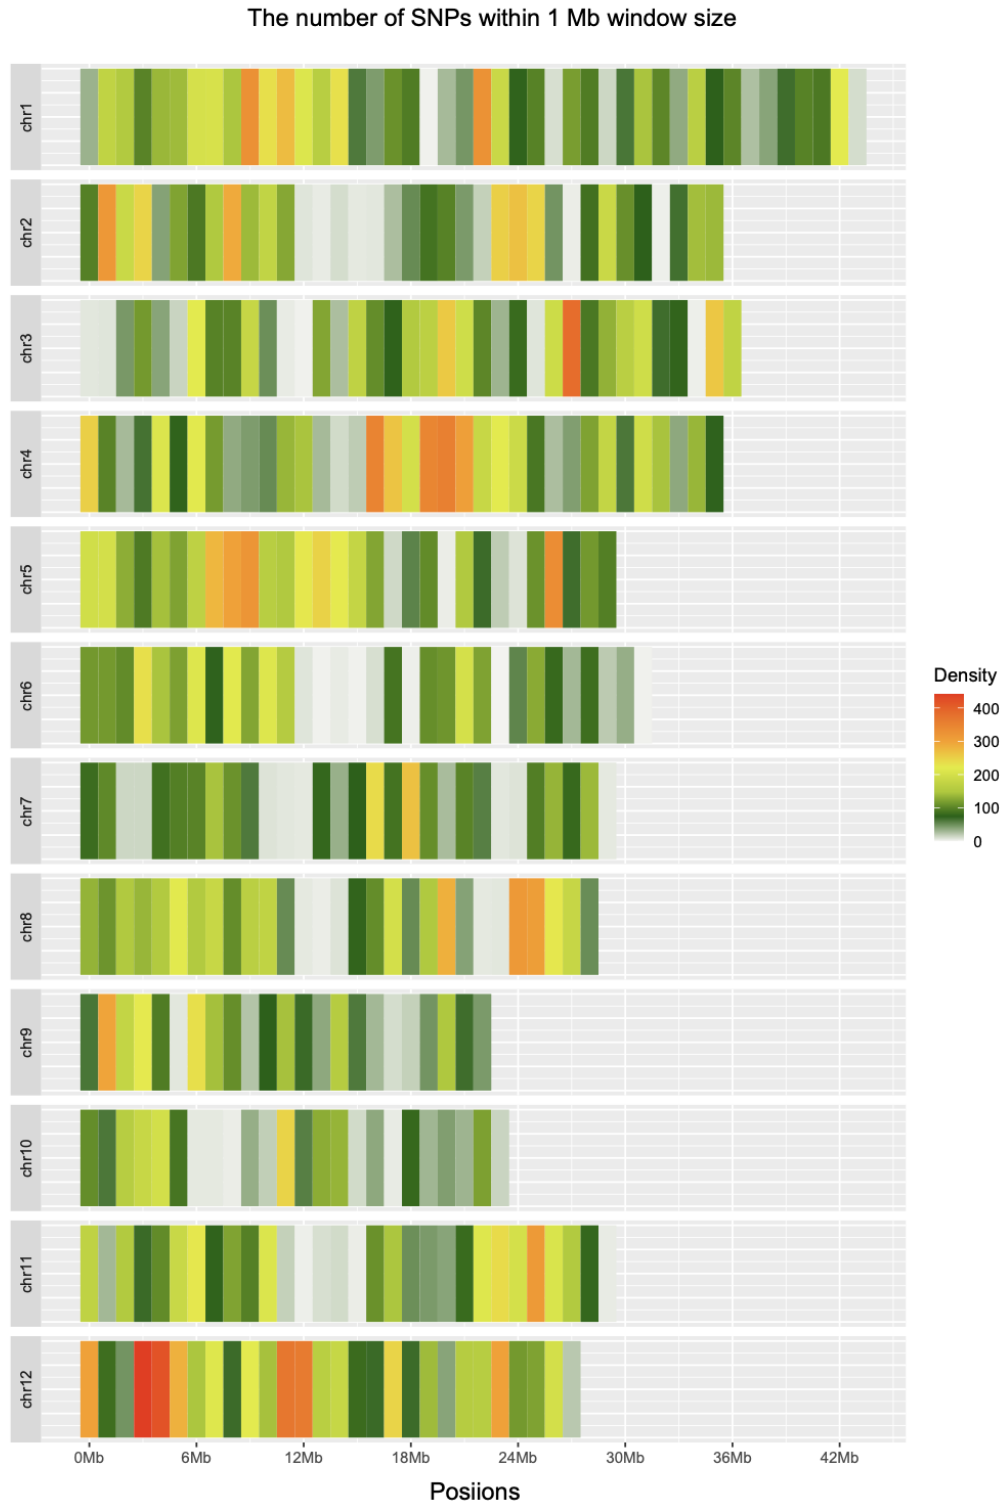

**Figure S2.** Distribution of SNPs on the 12 rice chromosomes. Vertical rectangular blocks represent 1-Mb windows. Different frequencies of SNPs in 1-Mb windows were indicated by different color codes.

**Table S1.** Annotated genes within the detected QTLs.

| QTL           | Chr | Start    | Stop     | Locus ID     | Description                                                                                                                                                                                       |
|---------------|-----|----------|----------|--------------|---------------------------------------------------------------------------------------------------------------------------------------------------------------------------------------------------|
| <i>qST1.1</i> | 1   | 5002454  | 5004321  | Os01g0192900 | 1-aminocyclopropane-1-carboxylic acid synthase, Submergence response                                                                                                                              |
|               | 1   | 5016279  | 5020150  | Os01g0193400 | TNFR/CD27/30/40/95 cysteine-rich region domain containing protein                                                                                                                                 |
|               | 1   | 5021104  | 5025704  | Os01g0193600 | Methyltransferase small domain containing protein                                                                                                                                                 |
|               | 1   | 5028275  | 5037189  | Os01g0193900 | ALWAYS EARLY/LIN-9 homologous protein                                                                                                                                                             |
|               | 1   | 5053133  | 5055753  | Os01g0194200 | IQ calmodulin-binding region domain containing protein                                                                                                                                            |
|               | 1   | 5060605  | 5065209  | Os01g0194300 | Ankyrin-repeat protein, Herbivore-induced defense response, Blast disease resistance                                                                                                              |
|               | 1   | 5085833  | 5086504  | Os01g0194600 | Thioredoxin fold domain containing protein                                                                                                                                                        |
|               | 1   | 5099555  | 5102080  | Os01g0195000 | Zinc finger and indeterminate domain (IDD) family transcription factor, Regulation of secondary cell wall formation                                                                               |
|               | 1   | 5109949  | 5112457  | Os01g0195200 | Similar to Serine/threonine-protein kinase PBS1 (EC 2.7.1.37) (AvrPphB susceptible protein 1)                                                                                                     |
|               | 1   | 5131629  | 5132915  | Os01g0195400 | Harpin-induced 1 domain containing protein                                                                                                                                                        |
|               | 1   | 5138518  | 5140925  | Os01g0195500 | Translation initiation factor SUI1 domain containing protein                                                                                                                                      |
|               | 1   | 5196418  | 5197056  | Os01g0196133 | Similar to H0315A08.1 protein                                                                                                                                                                     |
|               | 1   | 5201862  | 5203996  | Os01g0196300 | Basic helix-loop-helix (bHLH) transcription factor, Diterpenoid phytoalexin factor, Biosynthesis of diterpenoid phytoalexins, Stress response                                                     |
|               | 1   | 5213979  | 5216701  | Os01g0196500 | Prenylated rab acceptor PRA1 family protein                                                                                                                                                       |
|               | 1   | 5218573  | 5220335  | Os01g0196600 | Similar to 260 kDa major acidic fibroblast growth factor-stimulated phosphoprotein                                                                                                                |
|               | 1   | 5236623  | 5244520  | Os01g0197100 | Cytochrome P450, Brassinosteroids biosynthesis, Regulation of plant architecture                                                                                                                  |
|               | 1   | 5247340  | 5251192  | Os01g0197200 | Similar to predicted protein                                                                                                                                                                      |
|               | 1   | 5261189  | 5263102  | Os01g0197450 | Pentatricopeptide repeat domain containing protein                                                                                                                                                |
|               | 1   | 5264691  | 5266158  | Os01g0197500 | Similar to predicted protein                                                                                                                                                                      |
|               | 1   | 5270449  | 5275585  | Os01g0197700 | Cytokinin oxidase/dehydrogenase, Regulation of grain production                                                                                                                                   |
|               | 1   | 5288136  | 5302247  | Os01g0197900 | $\gamma$ -clade RNA-dependent RNA polymerase 3, Rice growth and development, Regulation of the expression of repeat-rich regions in the genome, Polymerase activity on both RNA and DNA templates |
|               | 1   | 5307415  | 5324478  | Os01g0198000 | $\gamma$ -clade RNA-dependent RNA polymerase 4, Rice growth and development                                                                                                                       |
|               | 1   | 5329063  | 5335518  | Os01g0198200 | Similar to Casein kinase-like protein                                                                                                                                                             |
|               | 1   | 5373630  | 5374681  | Os01g0198900 | Polyketide cyclase/dehydrase domain containing protein                                                                                                                                            |
|               | 1   | 5384196  | 5385088  | Os01g0199300 | Similar to lachrymatory factor synthase                                                                                                                                                           |
|               | 1   | 5389837  | 5394412  | Os01g0199400 | Alpha/beta hydrolase family protein                                                                                                                                                               |
|               | 1   | 5398321  | 5402018  | Os01g0199700 | Protein of unknown function DUF1677                                                                                                                                                               |
|               | 1   | 5406050  | 5412737  | Os01g0199900 | Similar to Phosphoribosylaminoimidazole carboxylase catalytic subunit (EC 4.1.1.21) (AIR carboxylase)                                                                                             |
|               | 1   | 5413595  | 5416778  | Os01g0200000 | Similar to autophagocytosis protein AUT1-like                                                                                                                                                     |
|               | 1   | 5424059  | 5424581  | Os01g0200200 | Protein of unknown function DUF1677                                                                                                                                                               |
|               | 1   | 5426582  | 5429390  | Os01g0200300 | Similar to Homeobox-leucine zipper protein HOX29                                                                                                                                                  |
|               | 1   | 5435443  | 5442646  | Os01g0200400 | Thioredoxin domain 2 containing protein                                                                                                                                                           |
|               | 1   | 5442866  | 5446246  | Os01g0200500 | MPPN family protein                                                                                                                                                                               |
|               | 1   | 5454772  | 5455667  | Os01g0200600 | Similar to Avr9/Cf-9 rapidly elicited protein 111A                                                                                                                                                |
|               | 1   | 5478545  | 5479749  | Os01g0200700 | Metallothionein-like protein, Tolerance to salinity and heavy metal stresses, Abiotic stress response                                                                                             |
|               | 1   | 5498215  | 5499226  | Os01g0201000 | Similar to protein kinase family protein                                                                                                                                                          |
| <i>qST1.2</i> | 1   | 41002584 | 41003731 | Os01g0934700 | Alpha/beta hydrolase fold-1 domain containing protein                                                                                                                                             |
|               | 1   | 41004305 | 41005945 | Os01g0934800 | Alpha/beta hydrolase fold-1 domain containing protein                                                                                                                                             |
|               | 1   | 41007465 | 41008440 | Os01g0934900 | Probable esterase PIR7A                                                                                                                                                                           |
|               | 1   | 41011330 | 41015063 | Os01g0935000 | Zinc finger, C2H2-type domain containing protein                                                                                                                                                  |
|               | 1   | 41021478 | 41021912 | Os01g0935100 | Nuclear factor Y (NF-Y) transcription factor B5, CCAAT box binding factor, Heme-associated protein 3J                                                                                             |

|             |   |          |          |              |                                                                                                                                        |
|-------------|---|----------|----------|--------------|----------------------------------------------------------------------------------------------------------------------------------------|
|             | 1 | 41028860 | 41030025 | Os01g0935200 | Nuclear factor Y (NF-Y) transcription factor B6, CCAAT box binding factor, Heme-associated protein 3G                                  |
|             | 1 | 41052368 | 41056409 | Os01g0935300 | Similar to cullin-1                                                                                                                    |
|             | 1 | 41057220 | 41058809 | Os01g0935400 | 2OG-Fe(II) oxygenase domain containing protein                                                                                         |
|             | 1 | 41061106 | 41067020 | Os01g0935500 | Similar to Potassium transporter 7 (OsHAK7)                                                                                            |
|             | 1 | 41066946 | 41070506 | Os01g0935600 | Immunoglobulin/major histocompatibility complex                                                                                        |
|             | 1 | 41074431 | 41079262 | Os01g0935700 | Similar to Cytochrome c1, heme protein                                                                                                 |
|             | 1 | 41079487 | 41080890 | Os01g0935800 | Similar to BRASSINOSTEROID INSENSITIVE 1-associated receptor kinase 1                                                                  |
|             | 1 | 41085902 | 41088168 | Os01g0935900 | Similar to Succinate dehydrogenase subunit 4                                                                                           |
|             | 1 | 41087786 | 41090680 | Os01g0936000 | Putative glutaredoxin-C2                                                                                                               |
|             | 1 | 41095911 | 41100367 | Os01g0936100 | Receptor-like cytoplasmic kinase 55                                                                                                    |
|             | 1 | 41100496 | 41105054 | Os01g0936200 | Lipase, class 3 family protein                                                                                                         |
|             | 1 | 41117216 | 41122215 | Os01g0936800 | PapD-like domain containing protein                                                                                                    |
|             | 1 | 41126538 | 41127824 | Os01g0936900 | Peptidase A1 domain containing protein                                                                                                 |
|             | 1 | 41133500 | 41134904 | Os01g0937000 | Peptidase aspartic, catalytic domain containing protein                                                                                |
|             | 1 | 41139355 | 41140629 | Os01g0937050 | Homolog of xylanase inhibitor, Chitinase-like protein, Defense response against pathogens, Growth regulation through calcium signaling |
|             | 1 | 41142013 | 41143416 | Os01g0937100 | Similar to Xylanase inhibitor precursor (Xylanase inhibitor TAXI-I)                                                                    |
|             | 1 | 41145301 | 41146727 | Os01g0937200 | Peptidase aspartic, catalytic domain containing protein                                                                                |
|             | 1 | 41149956 | 41154666 | Os01g0937300 | NB-ARC domain containing protein                                                                                                       |
|             | 1 | 41155827 | 41163821 | Os01g0937400 | NB-ARC domain containing protein                                                                                                       |
|             | 1 | 41166235 | 41167902 | Os01g0937500 | Peptidase aspartic, catalytic domain containing protein                                                                                |
|             | 1 | 41169527 | 41171002 | Os01g0937600 | Peptidase aspartic, catalytic domain containing protein                                                                                |
|             | 1 | 41187052 | 41188691 | Os01g0938100 | Photosystem II protein Psb28, class 1 domain containing protein                                                                        |
|             | 1 | 41193350 | 41198903 | Os01g0938200 | Similar to RNA-binding protein BRUNOL5 (Fragment)                                                                                      |
|             | 1 | 41214311 | 41217063 | Os01g0938900 | Similar to Nascent polypeptide-associated complex alpha subunit-like protein 3 (NAC-alpha-like protein 3)                              |
|             | 1 | 41220037 | 41227329 | Os01g0939100 | Similar to Calmodulin-stimulated calcium-ATPase                                                                                        |
|             | 1 | 41230854 | 41235586 | Os01g0939300 | BRCT domain containing protein                                                                                                         |
|             | 1 | 41242467 | 41243777 | Os01g0939500 | Similar to Eukaryotic peptide chain release factor subunit 1-2 (eRF1-2)                                                                |
|             | 1 | 41245588 | 41249894 | Os01g0939600 | Similar to Glycerol-3-phosphate dehydrogenase-like protein                                                                             |
|             | 1 | 41251235 | 41272093 | Os01g0939700 | Similar to Esterase D (EC 3.1.1.1)                                                                                                     |
|             | 1 | 41300203 | 41302983 | Os01g0940000 | Cytokinin oxidase/dehydrogenase, Crown root formation                                                                                  |
|             | 1 | 41305317 | 41314346 | Os01g0940100 | Hexokinase 3, Positive regulation of grain size                                                                                        |
|             | 1 | 41346647 | 41348373 | Os01g0940700 | Similar to Glucan endo-1,3-beta-glucosidase GII precursor (EC 3.2.1.39)                                                                |
|             | 1 | 41349731 | 41351118 | Os01g0940800 | Beta-1,3-glucanase 6, Defense response against <i>M. oryzae</i>                                                                        |
|             | 1 | 41365160 | 41366543 | Os01g0941200 | Similar to Glucan endo-1,3-beta-glucosidase GII precursor (EC 3.2.1.39)                                                                |
|             | 1 | 41375254 | 41376297 | Os01g0941500 | Similar to Beta-1,3-glucanase                                                                                                          |
|             | 1 | 41384339 | 41386372 | Os01g0941800 | Metallophosphoesterase domain containing protein                                                                                       |
|             | 1 | 41394739 | 41396203 | Os01g0942200 | Cyclin-like F-box domain containing protein                                                                                            |
|             | 1 | 41398051 | 41399089 | Os01g0942300 | Endo-(1,3;1,4)- $\beta$ -glucanase                                                                                                     |
|             | 1 | 41439358 | 41447125 | Os01g0942900 | Similar to cDNA clone:J023028M23                                                                                                       |
|             | 1 | 41470283 | 41478321 | Os01g0943800 | Similar to cDNA, clone: J100054L12                                                                                                     |
| <i>qST2</i> | 2 | 27262061 | 27263495 | Os02g0671200 | Protein of unknown function DUF295 domain containing protein                                                                           |
|             | 2 | 27266202 | 27269207 | Os02g0671300 | Basic helix-loop-helix dimerisation region bHLH domain containing protein                                                              |
|             | 2 | 27297098 | 27300008 | Os02g0671800 | Integrase, catalytic core domain containing protein                                                                                    |
|             | 2 | 27316157 | 27325651 | Os02g0672100 | C2H2-type zinc finger transcription factor, Promotion of flowering                                                                     |
|             | 2 | 27330175 | 27341732 | Os02g0672200 | Argonaute 1a protein, Target gene of osa-miR168a-5p, Salt tolerance                                                                    |
|             | 2 | 27352171 | 27357013 | Os02g0672400 | Sugar transporter, conserved site domain containing protein.                                                                           |
|             | 2 | 27357591 | 27359660 | Os02g0672500 | Similar to Mitochondrial import inner membrane translocase subunit tim23                                                               |
|             | 2 | 27360447 | 27365739 | Os02g0672600 | Subunit of RNA N6-methyladenosine methyltransferase, Regulation of embryo development                                                  |

|             |   |          |          |              |                                                                                                                                                                           |
|-------------|---|----------|----------|--------------|---------------------------------------------------------------------------------------------------------------------------------------------------------------------------|
|             | 2 | 27369142 | 27371727 | Os02g0672700 | DNA-directed RNA polymerase, M/15 kDa subunit domain containing protein                                                                                                   |
|             | 2 | 27372060 | 27376761 | Os02g0672800 | Similar to Protein kinase                                                                                                                                                 |
|             | 2 | 27386926 | 27388940 | Os02g0673000 | Uncharacterised protein family UPF0005 domain containing protein                                                                                                          |
|             | 2 | 27390847 | 27394188 | Os02g0673100 | Aluminum-activated malate transporter, Maintenance of panicle size and grain yield                                                                                        |
|             | 2 | 27416559 | 27421828 | Os02g0673500 | Basic helix-loop-helix (bHLH) DNA-binding protein, Regulation of metaxylem vessel number and area, Repression of drought-induced metaxylem plasticity                     |
|             | 2 | 27422921 | 27427541 | Os02g0673600 | ORMDL family protein                                                                                                                                                      |
|             | 2 | 27435303 | 27438545 | Os02g0673700 | Similar to OSIGBa0103M18.3 protein                                                                                                                                        |
|             | 2 | 27480264 | 27484556 | Os02g0674700 | Similar to protein binding protein                                                                                                                                        |
|             | 2 | 27487866 | 27494913 | Os02g0674800 | Homeodomain leucine zipper class IV transcriptional factor , Ortholog of Arabidopsis GLABRA2, Modulation of leaf rolling                                                  |
|             | 2 | 27507087 | 27511190 | Os02g0675400 | Similar to OSIGBa0111L12.2 protein                                                                                                                                        |
|             | 2 | 27531016 | 27534623 | Os02g0675700 | Protein of unknown function DUF248, methyltransferase putative family protein                                                                                             |
|             | 2 | 27548414 | 27551592 | Os02g0675800 | Cyclin-like F-box domain containing protein                                                                                                                               |
|             | 2 | 27559285 | 27567041 | Os02g0676000 | Membrane bound O-acyl transferase, MBOAT family protein                                                                                                                   |
|             | 2 | 27591163 | 27592963 | Os02g0676400 | Multi antimicrobial extrusion protein MatE family protein                                                                                                                 |
|             | 2 | 27602322 | 27606779 | Os02g0676500 | Similar to OSIGBa0127A14.6 protein                                                                                                                                        |
|             | 2 | 27621222 | 27622912 | Os02g0676800 | Similar to Dehydration responsive element binding protein 1E (DREB1E protein)                                                                                             |
|             | 2 | 27652935 | 27654206 | Os02g0677300 | Typical CBF/DREB1 transcription factor, Dehydration-responsive element binding protein 1G, Cold stress tolerance, Positive regulation of heat, salt and drought tolerance |
|             | 2 | 27662418 | 27667350 | Os02g0677700 | Similar to Nucleic acid binding protein                                                                                                                                   |
|             | 2 | 27667933 | 27671383 | Os02g0677800 | Similar to 40S ribosomal protein S13                                                                                                                                      |
|             | 2 | 27696289 | 27702009 | Os02g0678200 | SPX-MFS protein, Pi homeostasis                                                                                                                                           |
|             | 2 | 27702873 | 27705211 | Os02g0678300 | Similar to protein HOTHEAD                                                                                                                                                |
|             | 2 | 27709385 | 27713141 | Os02g0678400 | NAD(P)-binding domain containing protein                                                                                                                                  |
|             | 2 | 27727857 | 27728960 | Os02g0678800 | Transcriptional activator/repressor, Regulation of KNOX gene, Oskn2 (regulator of meristem function), Floral organogenesis                                                |
|             | 2 | 27737378 | 27738930 | Os02g0679200 | Pentatricopeptide repeat domain containing protein                                                                                                                        |
|             | 2 | 27744016 | 27747252 | Os02g0679500 | Similar to Rac GTPase activating protein 1                                                                                                                                |
| <i>qST3</i> | 3 | 31718262 | 31721710 | Os03g0765800 | Pyridoxal phosphate-dependent transferase                                                                                                                                 |
|             | 3 | 31725194 | 31725857 | Os03g0765900 | PetM of cytochrome b6/f complex subunit 7 domain containing protein                                                                                                       |
|             | 3 | 31726005 | 31732261 | Os03g0766000 | Similar to seven transmembrane domain protein                                                                                                                             |
|             | 3 | 31729638 | 31730211 | Os03g0766100 | 10 kDa prolamin precursor                                                                                                                                                 |
|             | 3 | 31732515 | 31733057 | Os03g0766200 | Bifunctional inhibitor/plant lipid transfer protein/seed storage domain containing protein                                                                                |
|             | 3 | 31735442 | 31736253 | Os03g0766350 | Bifunctional inhibitor/plant lipid transfer protein/seed storage domain containing protein                                                                                |
|             | 3 | 31749469 | 31755280 | Os03g0766500 | Similar to Two-component response regulator ARR1                                                                                                                          |
|             | 3 | 31759195 | 31767544 | Os03g0766900 | Allene oxide synthase                                                                                                                                                     |
|             | 3 | 31764991 | 31766985 | Os03g0767000 | Allene oxide synthase (CYP74A1), Biosynthesis of jasmonic acid (JA)                                                                                                       |
|             | 3 | 31778339 | 31781372 | Os03g0767500 | Thioredoxin domain 2 containing protein                                                                                                                                   |
|             | 3 | 31785151 | 31788078 | Os03g0767600 | BTB domain containing protein                                                                                                                                             |
|             | 3 | 31790621 | 31793202 | Os03g0767800 | Cold acclimation protein WCOR413-like protein                                                                                                                             |
|             | 3 | 31802310 | 31804146 | Os03g0767900 | Uncharacterised protein family UPF0497, trans-membrane plant domain containing protein                                                                                    |
|             | 3 | 31825518 | 31829665 | Os03g0769000 | Similar to ternary complex factor MIP1                                                                                                                                    |
|             | 3 | 31840737 | 31844402 | Os03g0769050 | Similar to EMB2756                                                                                                                                                        |
|             | 3 | 31845464 | 31847238 | Os03g0769100 | Chloroplast ribosomal protein S9, Early chloroplast development                                                                                                           |
|             | 3 | 31853946 | 31857784 | Os03g0769400 | BTB/POZ fold domain containing protein                                                                                                                                    |
|             | 3 | 31858526 | 31859454 | Os03g0769500 | EF-Hand type domain containing protein                                                                                                                                    |
|             | 3 | 31860523 | 31863362 | Os03g0769600 | ResB-like family protein                                                                                                                                                  |

|             |   |          |          |              |                                                                                                                   |
|-------------|---|----------|----------|--------------|-------------------------------------------------------------------------------------------------------------------|
|             | 3 | 31867214 | 31867887 | Os03g0769700 | Uncharacterised conserved protein UCP031279 domain containing protein                                             |
|             | 3 | 31869151 | 31871497 | Os03g0769800 | Similar to Homeodomain-leucine zipper protein interfascicular fiberless 1 (Revoluta)                              |
|             | 3 | 31874977 | 31876331 | Os03g0769900 | Similar to CF9                                                                                                    |
|             | 3 | 31885024 | 31885617 | Os03g0770000 | bZIP transcription factor                                                                                         |
|             | 3 | 31930835 | 31934477 | Os03g0770800 | CSLC9                                                                                                             |
|             | 3 | 31952891 | 31954550 | Os03g0771100 | MYELOBLASTOSIS (MYB) transcription factor 36c, Regulation of Casparian strip formation at the root endodermis     |
|             | 3 | 31964738 | 31970261 | Os03g0771500 | Similar to Isoform 2 of Homeobox protein knotted-1-like 8                                                         |
|             | 3 | 31986608 | 31991587 | Os03g0772100 | Similar to Homeobox protein knotted-1-like 8                                                                      |
|             | 3 | 32008474 | 32010598 | Os03g0772600 | Similar to Lectin-like receptor kinase 7;2                                                                        |
|             | 3 | 32013259 | 32015229 | Os03g0772700 | Similar to lectin-like receptor kinase 7                                                                          |
|             | 3 | 32017648 | 32019527 | Os03g0772800 | Cytochrome c oxidase, subunit VIa family protein                                                                  |
|             | 3 | 32028145 | 32029878 | Os03g0773000 | Protein of unknown function DUF1005 family protein                                                                |
|             | 3 | 32035018 | 32040880 | Os03g0773100 | Similar to Myb/SANT domain protein                                                                                |
|             | 3 | 32041607 | 32043400 | Os03g0773150 | 40S ribosomal protein S29                                                                                         |
|             | 3 | 32043966 | 32048393 | Os03g0773300 | Protein kinase, core domain containing protein                                                                    |
|             | 3 | 32064251 | 32071104 | Os03g0773600 | Kinesin, motor region domain containing protein. (Os03t0773600-01);Hypothetical conserved gene. (Os03t0773600-02) |
|             | 3 | 32079178 | 32082438 | Os03g0773700 | Similar to Receptor-like protein kinase 2                                                                         |
|             | 3 | 32086041 | 32089677 | Os03g0773800 | Similar to Malate dehydrogenase, glyoxysomal precursor (EC 1.1.1.37) (mbNAD-MDH)                                  |
|             | 3 | 32092409 | 32095619 | Os03g0774200 | Similar to NADH-ubiquinone oxidoreductase subunit 8 (EC 1.6.5.3)                                                  |
|             | 3 | 32096850 | 32103996 | Os03g0774300 | HAD superfamily (subfamily IG) hydrolase, 5'-Nucleotidase protein                                                 |
|             | 3 | 32107062 | 32109944 | Os03g0774400 | Similar to predicted protein                                                                                      |
|             | 3 | 32136863 | 32139508 | Os03g0775000 | Leucine carboxyl methyltransferase domain containing protein                                                      |
|             | 3 | 32142168 | 32146666 | Os03g0775200 | Protein of unknown function DUF248, methyltransferase putative family protein                                     |
|             | 3 | 32147180 | 32150669 | Os03g0775300 | Flavodoxin/nitric oxide synthase domain containing protein                                                        |
|             | 3 | 32150822 | 32153382 | Os03g0775400 | Tetratricopeptide-like helical domain containing protein                                                          |
|             | 3 | 32153925 | 32157349 | Os03g0775500 | Protein of unknown function DUF59 domain containing protein                                                       |
|             | 3 | 32160235 | 32163775 | Os03g0775600 | Similar to predicted protein                                                                                      |
|             | 3 | 32175291 | 32182089 | Os03g0776000 | Glucose-6-phosphate isomerase, cytosolic A (EC 5.3.1.9) (GPI-A)                                                   |
|             | 3 | 32208931 | 32210830 | Os03g0776900 | Similar to mitochondrial import inner membrane translocase subunit TIM14                                          |
|             | 3 | 32234319 | 32236419 | Os03g0777000 | NAC transcription factor, Positive regulation of resistance to blast and bacterial blight                         |
|             | 3 | 32244456 | 32246820 | Os03g0777500 | Protein of unknown function DUF1068 family protein                                                                |
| <i>qST6</i> | 6 | 3507359  | 3509141  | Os06g0169900 | Similar to GOS9 protein                                                                                           |
|             | 6 | 3515130  | 3518031  | Os06g0170100 | Similar to WAK80 - OsWAK receptor-like protein kinase                                                             |
|             | 6 | 3536683  | 3540219  | Os06g0170500 | Similar to RNA-binding protein-like                                                                               |
|             | 6 | 3558158  | 3559922  | Os06g0170800 | Similar to H0124B04.16 protein                                                                                    |
|             | 6 | 3559947  | 3561401  | Os06g0170866 | F-box domain, cyclin-like domain containing protein                                                               |
|             | 6 | 3588217  | 3595865  | Os06g0171600 | Membrane insertion protein, OxaA/YidC domain containing protein                                                   |
|             | 6 | 3596001  | 3598291  | Os06g0171700 | Cdk-activating kinase assembly factor (MAT1) family protein                                                       |
|             | 6 | 3598466  | 3605188  | Os06g0171800 | VRR-NUC domain containing protein                                                                                 |
|             | 6 | 3632670  | 3639453  | Os06g0171900 | WD40 subfamily protein, Salt stress (Os06t0171900-01)                                                             |
|             | 6 | 3640786  | 3643222  | Os06g0172000 | Pentatricopeptide repeat domain containing protein                                                                |
|             | 6 | 3649517  | 3650686  | Os06g0172200 | EF-Hand type domain containing protein                                                                            |
|             | 6 | 3656494  | 3657055  | Os06g0172600 | Similar to predicted protein                                                                                      |
|             | 6 | 3675795  | 3679085  | Os06g0172800 | Similar to alkaline alpha galactosidase 2                                                                         |
|             | 6 | 3682377  | 3688555  | Os06g0173000 | Armadillo-type fold domain containing protein                                                                     |
|             | 6 | 3689676  | 3694342  | Os06g0173100 | 26S proteasome 19S regulatory particle triple-A ATPase subunit 5b                                                 |
|             | 6 | 3723342  | 3725225  | Os06g0173800 | SANT domain, DNA binding domain containing protein                                                                |
|             | 6 | 3759843  | 3762120  | Os06g0174300 | Similar to predicted protein                                                                                      |
|             | 6 | 3773690  | 3776480  | Os06g0174400 | Similar to Vesicle-associated membrane protein 712 (AtVAMP712)                                                    |
|             | 6 | 3801240  | 3807766  | Os06g0175500 | Epsin-like, N-terminal domain containing protein                                                                  |

|             |   |          |          |              |                                                                                                                                                                             |
|-------------|---|----------|----------|--------------|-----------------------------------------------------------------------------------------------------------------------------------------------------------------------------|
|             | 6 | 3823021  | 3827326  | Os06g0175800 | Similar to Cystathionine beta-lyase, chloroplast precursor (EC 4.4.1.8) (CBL)                                                                                               |
|             | 6 | 3828103  | 3830152  | Os06g0175900 | Similar to Cytochrome b-c1 complex subunit 8                                                                                                                                |
|             | 6 | 3832018  | 3833094  | Os06g0176000 | Proteasome subunit alpha type 4 (EC 3.4.25.1)                                                                                                                               |
|             | 6 | 3834088  | 3836629  | Os06g0176100 | Similar to H0201G08.5 protein                                                                                                                                               |
|             | 6 | 3837428  | 3839409  | Os06g0176150 | Similar to Ribosomal protein S15 containing protein                                                                                                                         |
|             | 6 | 3840732  | 3844710  | Os06g0176200 | Glycosyl transferase, family 31 protein                                                                                                                                     |
|             | 6 | 3846106  | 3848325  | Os06g0176300 | Putative Fe(II)/2-oxoglutarate-dependent oxygenase, HIS1-like protein 5                                                                                                     |
|             | 6 | 3851122  | 3854303  | Os06g0176500 | Putative Fe(II)/2-oxoglutarate-dependent oxygenase, HIS1-like protein 4                                                                                                     |
|             | 6 | 3855568  | 3857390  | Os06g0176700 | HIS1-like protein, Fe(II)/2-oxoglutarate-dependent oxygenase                                                                                                                |
|             | 6 | 3858434  | 3860468  | Os06g0176850 | Putative Fe(II)/2-oxoglutarate-dependent oxygenase, HIS1-like protein 6                                                                                                     |
|             | 6 | 3861480  | 3865179  | Os06g0176900 | Similar to Cystathionine gamma-synthase                                                                                                                                     |
|             | 6 | 3866159  | 3868208  | Os06g0177000 | Similar to Cytochrome b-c1 complex subunit 8                                                                                                                                |
|             | 6 | 3870074  | 3871150  | Os06g0177100 | Proteasome subunit alpha type 4 (EC 3.4.25.1)                                                                                                                               |
|             | 6 | 3872144  | 3874685  | Os06g0177200 | Similar to H0201G08.5 protein                                                                                                                                               |
|             | 6 | 3875484  | 3877465  | Os06g0177250 | Similar to Ribosomal protein S15 containing protein                                                                                                                         |
|             | 6 | 3878788  | 3882766  | Os06g0177300 | Glycosyl transferase, family 31 protein                                                                                                                                     |
|             | 6 | 3884162  | 3886381  | Os06g0177600 | Putative Fe(II)/2-oxoglutarate-dependent oxygenase, HIS1-like protein 5                                                                                                     |
|             | 6 | 3889178  | 3892359  | Os06g0177700 | Putative Fe(II)/2-oxoglutarate-dependent oxygenase, HIS1-like protein 4                                                                                                     |
|             | 6 | 3893624  | 3895446  | Os06g0178500 | Putative Fe(II)/2-oxoglutarate-dependent oxygenase, HIS1-like protein 1                                                                                                     |
|             | 6 | 3896490  | 3898524  | Os06g0178650 | Putative Fe(II)/2-oxoglutarate-dependent oxygenase, HIS1-like protein 6                                                                                                     |
|             | 6 | 3900488  | 3903056  | Os06g0178700 | Putative Fe(II)/2-oxoglutarate-dependent oxygenase, HIS1-like protein 2                                                                                                     |
|             | 6 | 3919532  | 3924302  | Os06g0178900 | Vacuolar H <sup>+</sup> -pyrophosphatase                                                                                                                                    |
|             | 6 | 3924758  | 3927818  | Os06g0179000 | Glycoside hydrolase family 79, N-terminal protein                                                                                                                           |
|             | 6 | 3932020  | 3933032  | Os06g0179100 | Similar to H0306F03.13 protein                                                                                                                                              |
|             | 6 | 3934027  | 3937229  | Os06g0179200 | Similar to Nodulin-like protein                                                                                                                                             |
|             | 6 | 3941687  | 3943447  | Os06g0179500 | Protein of unknown function DUF247                                                                                                                                          |
|             | 6 | 3947927  | 3952217  | Os06g0179700 | Similar to DNA-binding protein phosphatase 2C                                                                                                                               |
|             | 6 | 3956913  | 3961586  | Os06g0179800 | Leucine-rich repeat, N-terminal domain containing protein                                                                                                                   |
|             | 6 | 3961923  | 3964854  | Os06g0179900 | Major facilitator superfamily protein                                                                                                                                       |
|             | 6 | 3966107  | 3969423  | Os06g0180000 | Similar to Root determined nodulation 1                                                                                                                                     |
|             | 6 | 3992690  | 3993053  | Os06g0180533 | Similar to predicted protein                                                                                                                                                |
| <i>qST8</i> | 8 | 26501167 | 26506198 | Os08g0531600 | Transcription factor, Positive regulator of cell proliferation, Control of grain size, shape and quality                                                                    |
|             | 8 | 26507926 | 26512261 | Os08g0531700 | MADS-box transcription factor, Regulation of floral identity, Regulation of amylose content at high temperature                                                             |
|             | 8 | 26518976 | 26529016 | Os08g0531900 | Similar to MADS box transcription factor-like protein (MADS-box protein AGL72)                                                                                              |
|             | 8 | 26531415 | 26534074 | Os08g0532200 | Glutamate 1-semialdehyde 2,1-aminomutase, Tetrapyrrole biosynthesis                                                                                                         |
|             | 8 | 26535221 | 26537302 | Os08g0532300 | Similar to Nuclear transport factor 2 (NTF-2)                                                                                                                               |
|             | 8 | 26537672 | 26542835 | Os08g0532400 | Similar to AT.I.24-7 protein                                                                                                                                                |
|             | 8 | 26546039 | 26549956 | Os08g0532600 | Similar to Peroxidase                                                                                                                                                       |
|             | 8 | 26546988 | 26549806 | Os08g0532700 | Similar to Peroxidase 55 precursor (EC 1.11.1.7) (Atperox P55) (ATP20a)                                                                                                     |
|             | 8 | 26554159 | 26557021 | Os08g0532800 | Plant lipid transfer protein/seed storage/trypsin-alpha amylase inhibitor domain containing protein. (Os08t0532800-02);Similar to Lipid transfer protein. (Os08t0532800-03) |
|             | 8 | 26558909 | 26562152 | Os08g0532900 | emp24/gp25L/p24 family protein                                                                                                                                              |
|             | 8 | 26572162 | 26574946 | Os08g0533300 | Similar to ACR5. (Os08t0533300-01)                                                                                                                                          |
|             | 8 | 26601165 | 26605539 | Os08g0533600 | Similar to ACR4. (Os08t0533600-01)                                                                                                                                          |

|              |    |          |          |              |                                                                                                                                    |
|--------------|----|----------|----------|--------------|------------------------------------------------------------------------------------------------------------------------------------|
|              | 8  | 26606691 | 26609530 | Os08g0533700 | Similar to cation cation antiporter                                                                                                |
|              | 8  | 26652114 | 26655784 | Os08g0534200 | Similar to HEAT repeat family protein                                                                                              |
|              | 8  | 26656152 | 26656650 | Os08g0534300 | Similar to calmodulin binding protein                                                                                              |
|              | 8  | 26658525 | 26667717 | Os08g0534350 | Similar to cation cation antiporter                                                                                                |
|              | 8  | 26662244 | 26664175 | Os08g0534400 | EKC/KEOPS complex, subunit Pcc1 domain containing protein                                                                          |
|              | 8  | 26687987 | 26694103 | Os08g0534900 | Armadillo-type fold domain containing protein                                                                                      |
|              | 8  | 26694471 | 26694969 | Os08g0534950 | Similar to calmodulin binding protein                                                                                              |
|              | 8  | 26696844 | 26699288 | Os08g0535000 | Similar to cation cation antiporter                                                                                                |
|              | 8  | 26725952 | 26728794 | Os08g0535200 | Sugar transporter, A member of the MtN3 gene family, Host disease-susceptibility gene for bacterial blight                         |
|              | 8  | 26744957 | 26748439 | Os08g0535400 | Zinc finger, DHHC-type domain containing protein                                                                                   |
|              | 8  | 26749784 | 26751095 | Os08g0535600 | Zinc finger, Tim10/DDP-type family protein                                                                                         |
|              | 8  | 26751395 | 26754247 | Os08g0535700 | Similar to glycerophosphodiester phosphodiesterase                                                                                 |
|              | 8  | 26766816 | 26770335 | Os08g0535800 | No apical meristem (NAM) protein domain containing protein                                                                         |
|              | 8  | 26777982 | 26783294 | Os08g0536000 | Similar to Pyruvate dehydrogenase E1 beta subunit isoform 1 (EC 1.2.4.1)                                                           |
|              | 8  | 26791868 | 26792452 | Os08g0536200 | Uncharacterised protein family UPF0497, trans-membrane plant subgroup domain containing protein                                    |
|              | 8  | 26792942 | 26797114 | Os08g0536300 | CONSTANS-like transcription factor, Rice ortholog of AtCOL15, Floral regulator, Suppression of flowering                           |
|              | 8  | 26841064 | 26843300 | Os08g0536800 | Similar to TA1 protein                                                                                                             |
|              | 8  | 26871277 | 26879986 | Os08g0537600 | Arf GTPase activating protein family protein                                                                                       |
|              | 8  | 26883126 | 26887362 | Os08g0537800 | Otubain-like protease with deubiquitination activity, Determination of grain size and shape                                        |
|              | 8  | 26887813 | 26895496 | Os08g0537900 | ERF-X-type transcription factor, Negative regulation of shoot growth and tolerance to salinity stress                              |
|              | 8  | 26900384 | 26904520 | Os08g0538000 | Glycyl-tRNA synthetase 3, Heading date                                                                                             |
|              | 8  | 26905017 | 26906620 | Os08g0538200 | Protein of unknown function DUF247, plant family protein                                                                           |
|              | 8  | 26909127 | 26913494 | Os08g0538300 | LysM receptor-like kinase, Chitin elicitor signaling                                                                               |
|              | 8  | 26918197 | 26921534 | Os08g0538600 | Stress up-regulated Nod 19 family protein                                                                                          |
|              | 8  | 26922222 | 26928300 | Os08g0538700 | Retinoblastoma-related protein, Control of inner floral organ formation, Establishment and maintenance of floral meristem function |
|              | 8  | 26932311 | 26935259 | Os08g0538800 | Pentatricopeptide repeat domain containing protein                                                                                 |
|              | 8  | 26938833 | 26942097 | Os08g0539100 | Zinc finger, DHHC-type domain containing protein                                                                                   |
|              | 8  | 26948601 | 26953317 | Os08g0539300 | C3HC4-type zinc finger protein, Target of miR528, Regulation of flowering under LD conditions                                      |
|              | 8  | 26968546 | 26978236 | Os08g0539400 | Similar to Resistance protein T1orga2-1A                                                                                           |
|              | 8  | 26982655 | 26986692 | Os08g0539600 | Similar to Ankyrin repeat domain-containing protein 2                                                                              |
|              | 8  | 26989664 | 26997637 | Os08g0539700 | Rice blast resistance protein Pib homologue                                                                                        |
| <i>qST10</i> | 10 | 17755806 | 17763648 | Os10g0476600 | Similar to Protein phosphatase 2A 62 kDa B                                                                                         |
|              | 10 | 17766864 | 17772031 | Os10g0476700 | Esterase, SGNH hydrolase-type                                                                                                      |
|              | 10 | 17773251 | 17776920 | Os10g0476900 | Pentatricopeptide repeat domain containing protein                                                                                 |
|              | 10 | 17778502 | 17793323 | Os10g0477000 | Armadillo-like helical domain containing protein                                                                                   |
|              | 10 | 17794333 | 17799688 | Os10g0477100 | Pectin methyltransferase, Maintenance of the cell wall properties in pistil transmitting tissues, Pectin modification              |
|              | 10 | 17800146 | 17803220 | Os10g0477200 | Pentatricopeptide repeat domain containing protein                                                                                 |
|              | 10 | 17849091 | 17851345 | Os10g0477600 | Similar to NAM / CUC2-like protein                                                                                                 |
|              | 10 | 17857988 | 17872546 | Os10g0477800 | Similar to Nuclear transportin. (Os10t0477800-01)                                                                                  |
|              | 10 | 17873385 | 17876746 | Os10g0477900 | Similar to NAD dependent epimerase/dehydratase family protein, expressed                                                           |
|              | 10 | 17888297 | 17889724 | Os10g0478000 | Transcriptional regulator, Regulator of meristem activity, Regulation of inflorescence development                                 |
|              | 10 | 17905870 | 17910800 | Os10g0478100 | Heat shock protein DnaJ, N-terminal domain containing protein                                                                      |
|              | 10 | 17913831 | 17917765 | Os10g0478200 | NAD-dependent cytosolic malate dehydrogenase (CMDH), Starch synthesis, Seed development                                            |
|              | 10 | 17923596 | 17926286 | Os10g0478300 | SG2-type MYB transcription factor, Resistance to fungal and bacterial pathogens                                                    |
|              | 10 | 17945273 | 17946549 | Os10g0478450 | MATH domain containing protein                                                                                                     |

|              |    |          |          |              |                                                                                                                                                          |
|--------------|----|----------|----------|--------------|----------------------------------------------------------------------------------------------------------------------------------------------------------|
|              | 10 | 17949628 | 17952014 | Os10g0478500 | MATH domain containing protein                                                                                                                           |
|              | 10 | 17967690 | 17971234 | Os10g0478900 | Multi-organelle localized protein, Control of leaf senescence, Disease resistance, Salt tolerance                                                        |
|              | 10 | 18000856 | 18005796 | Os10g0479500 | Similar to carboxy-lyase                                                                                                                                 |
|              | 10 | 18006974 | 18009702 | Os10g0479600 | Protein Transporter, Pam16 family protein                                                                                                                |
|              | 10 | 18011909 | 18018928 | Os10g0479700 | Protein of unknown function DUF250 domain containing protein                                                                                             |
|              | 10 | 18038745 | 18040810 | Os10g0479800 | Protein of unknown function DUF1336 domain containing protein                                                                                            |
|              | 10 | 18051857 | 18056890 | Os10g0479900 | Transcriptional factor B3 family protein                                                                                                                 |
|              | 10 | 18085539 | 18092497 | Os10g0480200 | Similar to Rolled leaf1. (Os10t0480200-01);Similar to Rolled leaf1. (Os10t0480200-02);Similar to Homeobox-leucine zipper protein HOX9. (Os10t0480200-03) |
|              | 10 | 18102674 | 18108764 | Os10g0480500 | Double-stranded RNA-binding protein 2, Modulation of leaf rolling by regulating accumulation of microRNAs related to leaf development (Os10t0480500-01)  |
|              | 10 | 18120546 | 18121067 | Os10g0480900 | Similar to H0515C11                                                                                                                                      |
|              | 10 | 18141088 | 18142764 | Os10g0481100 | Similar to Aquaporin                                                                                                                                     |
|              | 10 | 18145792 | 18149595 | Os10g0481300 | Similar to Glutathione S-transferase, N-terminal domain containing protein                                                                               |
|              | 10 | 18150730 | 18152862 | Os10g0481400 | Similar to Zinc finger, C3HC4 type family protein, expressed                                                                                             |
|              | 10 | 18153642 | 18156878 | Os10g0481450 | Similar to Zinc finger, C3HC4 type family protein, expressed                                                                                             |
|              | 10 | 18169120 | 18172321 | Os10g0481500 | Similar to Flotillin-like protein 1                                                                                                                      |
|              | 10 | 18203248 | 18205758 | Os10g0482200 | Cold tolerance at the booting stage                                                                                                                      |
|              | 10 | 18214554 | 18217773 | Os10g0482450 | Similar to Flotillin-like protein 3                                                                                                                      |
|              | 10 | 18225297 | 18227300 | Os10g0482700 | Similar to Flotillin-like protein 2                                                                                                                      |
|              | 10 | 18231655 | 18236510 | Os10g0482900 | Thioredoxin fold domain containing protein                                                                                                               |
|              | 10 | 18240660 | 18243388 | Os10g0483000 | Basal transcription factor 3-like protein, Vegetative growth and reproductive development                                                                |
| <i>qST11</i> | 11 | 5755644  | 5758642  | Os11g0210600 | Similar to Alcohol dehydrogenase                                                                                                                         |
|              | 11 | 5773790  | 5777594  | Os11g0211200 | Similar to Tubulin-specific chaperon-like protein                                                                                                        |
|              | 11 | 5777015  | 5787839  | Os11g0211300 | Similar to NBS-LRR disease resistance protein homologue                                                                                                  |
|              | 11 | 5798254  | 5799120  | Os11g0211600 | Similar to Leucine Rich Repeat family protein                                                                                                            |
|              | 11 | 5799558  | 5802020  | Os11g0211650 | Similar to Leucine Rich Repeat family protein                                                                                                            |
|              | 11 | 5808714  | 5809427  | Os11g0211800 | Cysteine-rich peptide, Short-chain peptide, ABA-dependent drought tolerance                                                                              |
|              | 11 | 5820879  | 5826729  | Os11g0212000 | Similar to Leucine Rich Repeat family protein, expressed                                                                                                 |
|              | 11 | 5828346  | 5828666  | Os11g0212100 | Similar to NBS-LRR disease resistance protein family-4                                                                                                   |
|              | 11 | 5839249  | 5840796  | Os11g0212300 | Similar to Protein kinase domain containing protein, expressed                                                                                           |
|              | 11 | 5859750  | 5868313  | Os11g0212900 | Serine/threonine protein kinase-related domain containing protein                                                                                        |
|              | 11 | 5873537  | 5881813  | Os11g0213000 | Similar to Protein kinase domain containing protein, expressed                                                                                           |
|              | 11 | 5895364  | 5897167  | Os11g0213500 | Pentatricopeptide repeat protein, Mitochondrial nad7 transcript editing, Seed development                                                                |
|              | 11 | 5898818  | 5902693  | Os11g0213600 | Peptidase S10, serine carboxypeptidase family protein                                                                                                    |
|              | 11 | 5908294  | 5911943  | Os11g0213700 | Leucine-rich repeat, typical subtype containing protein                                                                                                  |
|              | 11 | 5916975  | 5919022  | Os11g0213800 | Similar to NBS-LRR disease resistance protein homologue                                                                                                  |
|              | 11 | 5936538  | 5938449  | Os11g0214100 | Plant disease resistance response protein domain containing protein                                                                                      |
|              | 11 | 5947363  | 5948231  | Os11g0214400 | Plant disease resistance response protein family protein                                                                                                 |
|              | 11 | 5962686  | 5974624  | Os11g0214700 | Plant disease resistance response protein domain containing protein                                                                                      |
|              | 11 | 5978273  | 5978986  | Os11g0214900 | Plant disease resistance response protein family protein                                                                                                 |
|              | 11 | 5996508  | 5997392  | Os11g0215100 | Plant disease resistance response protein family protein.                                                                                                |
|              | 11 | 6020972  | 6024097  | Os11g0215400 | Peptidase aspartic, catalytic domain containing protein                                                                                                  |
|              | 11 | 6059390  | 6065434  | Os11g0216000 | Pyruvate kinase, Regulation of seed germination, Glycolytic metabolism and GA/ABA balance                                                                |
|              | 11 | 6065311  | 6066797  | Os11g0216100 | Similar to Heat shock protein binding protein                                                                                                            |
|              | 11 | 6068242  | 6073759  | Os11g0216300 | ABC-1 domain containing protein                                                                                                                          |
|              | 11 | 6088031  | 6091472  | Os11g0216400 | Peptidase S8, subtilisin-related domain containing protein                                                                                               |
|              | 11 | 6102863  | 6106487  | Os11g0216900 | Similar to IDI2                                                                                                                                          |
|              | 11 | 6109578  | 6113725  | Os11g0217300 | Mevalonate and galactokinase family protein                                                                                                              |
|              | 11 | 6114798  | 6127569  | Os11g0217500 | Similar to mRNA capping enzyme, C-terminal domain containing protein, expressed                                                                          |

|              |    |          |          |              |                                                                                                            |
|--------------|----|----------|----------|--------------|------------------------------------------------------------------------------------------------------------|
|              | 11 | 6143031  | 6146613  | Os11g0218000 | bZIP transcription factor, bZIP-1 domain containing protein                                                |
|              | 11 | 6146834  | 6148416  | Os11g0218100 | Similar to RNAPol24                                                                                        |
|              | 11 | 6155842  | 6156093  | Os11g0218200 | Similar to RNAPol24                                                                                        |
|              | 11 | 6187696  | 6188042  | Os11g0218560 | Similar to Protein kinase domain containing protein, expressed                                             |
|              | 11 | 6188378  | 6188807  | Os11g0218619 | Similar to Protein kinase domain containing protein, expressed                                             |
|              | 11 | 6189723  | 6190015  | Os11g0218678 | Similar to Protein kinase domain containing protein, expressed                                             |
|              | 11 | 6192714  | 6193229  | Os11g0218737 | Similar to Protein kinase domain containing protein, expressed                                             |
|              | 11 | 6201172  | 6204657  | Os11g0219000 | Peptidase S16, lon N-terminal domain containing protein                                                    |
|              | 11 | 6218498  | 6226650  | Os11g0219400 | Ankyrin repeat containing protein                                                                          |
| <i>qST12</i> | 12 | 26506314 | 26507238 | Os12g0621400 | Conserved hypothetical protein                                                                             |
|              | 12 | 26507440 | 26513551 | Os12g0621500 | Similar to IRE                                                                                             |
|              | 12 | 26543468 | 26544296 | Os12g0621832 | Similar to H0315A08.1 protein                                                                              |
|              | 12 | 26548466 | 26555878 | Os12g0621900 | Similar to Mov34/MPN/PAD-1 family protein, expressed                                                       |
|              | 12 | 26578011 | 26580981 | Os12g0622500 | Homologue of the archaeal topoisomerase VIA, Mediation of double-strand DNA cleavage, Required for meiosis |
|              | 12 | 26599762 | 26604728 | Os12g0622900 | Mov34/MPN/PAD-1 family protein                                                                             |
|              | 12 | 26621211 | 26626093 | Os12g0623500 | Similar to Cationic amino acid transporter-like protein                                                    |
|              | 12 | 26629926 | 26632504 | Os12g0623600 | Protein of unknown function DUF1637 family protein                                                         |
|              | 12 | 26635697 | 26637314 | Os12g0623800 | Similar to GLA1                                                                                            |
|              | 12 | 26645025 | 26651101 | Os12g0623900 | Similar to Ethylene-responsive methionine synthase                                                         |
|              | 12 | 26657277 | 26662924 | Os12g0624000 | Similar to Methionine synthase protein                                                                     |
|              | 12 | 26663164 | 26664821 | Os12g0624100 | Similar to Small heat shock-like protein                                                                   |
|              | 12 | 26669155 | 26670534 | Os12g0624200 | Similar to K-exchanger-like protein                                                                        |
|              | 12 | 26684734 | 26685828 | Os12g0624700 | Protein of unknown function DUF1677                                                                        |
|              | 12 | 26693520 | 26696511 | Os12g0624900 | Similar to GATA transcription factor 2                                                                     |
|              | 12 | 26698650 | 26703087 | Os12g0625000 | O-acetylserine(thiol) lyase, Cysteine synthase                                                             |
|              | 12 | 26759757 | 26762339 | Os12g0626100 | Similar to HEAT-like                                                                                       |
|              | 12 | 26768220 | 26768893 | Os12g0626200 | Auxin responsive SAUR protein family protein                                                               |
|              | 12 | 26770732 | 26779064 | Os12g0626300 | Similar to MRNA, complete cds, clone                                                                       |
|              | 12 | 26780492 | 26783584 | Os12g0626400 | Similar to Phytoene synthase 1, chloroplast precursor (EC 2.5.1.-) (Fruit ripening specific protein pTOM5) |
|              | 12 | 26793127 | 26793851 | Os12g0626500 | Similar to late embryogenesis abundant protein D-34                                                        |
|              | 12 | 26888810 | 26890166 | Os12g0628100 | Similar to Actin-depolymerizing factor 6 (ADF-6) (AtADF6)                                                  |
|              | 12 | 26902158 | 26905922 | Os12g0628400 | Fatty acid 2-hydroxylase, Resistance to rice blast fungus infection                                        |
|              | 12 | 26906313 | 26910025 | Os12g0628500 | Similar to Methionine aminopeptidase                                                                       |
|              | 12 | 26913087 | 26913851 | Os12g0628600 | Similar to Thaumatin-like pathogenesis-related protein 3 precursor                                         |
|              | 12 | 26922175 | 26922699 | Os12g0629300 | Similar to Thaumatin-like protein                                                                          |
|              | 12 | 26932273 | 26933292 | Os12g0629600 | Thaumatin-like protein                                                                                     |
|              | 12 | 26946904 | 26947698 | Os12g0629700 | Similar to Thaumatin-like protein precursor                                                                |
|              | 12 | 26956203 | 26956894 | Os12g0630100 | Thaumatin protein, Tolerance to nitrogen deficiency                                                        |
|              | 12 | 26960487 | 26961383 | Os12g0630200 | Thaumatin, pathogenesis-related family protein                                                             |
|              | 12 | 26980121 | 26981082 | Os12g0630500 | Similar to Thaumatin-like protein                                                                          |
|              | 12 | 26985401 | 26986264 | Os12g0630600 | Carbohydrate/puine kinase, PfkB, conserved site containing protein                                         |

Table S2. Gene ontology (GO) terms and annotations for the differentially expressed genes.

| QTL    | RAP-DB id    | MSU id         | Putative Function                                                                    | GOSlim ID  | GO Name                                                               | Type |
|--------|--------------|----------------|--------------------------------------------------------------------------------------|------------|-----------------------------------------------------------------------|------|
| qST1.1 | Os01g0199400 | LOC_Os01g10250 | hydrolase, alpha/beta fold family domain containing protein, expressed               | GO:0008152 | metabolic process                                                     | P    |
|        | Os01g0199400 | LOC_Os01g10250 | hydrolase, alpha/beta fold family domain containing protein, expressed               | GO:0016787 | hydrolase activity                                                    | F    |
|        | Os01g0199900 | LOC_Os01g10280 | phosphoribosylaminoimidazole carboxylase, chloroplast precursor, putative, expressed | GO:0007275 | multicellular organismal development                                  | P    |
|        | Os01g0199900 | LOC_Os01g10280 | phosphoribosylaminoimidazole carboxylase, chloroplast precursor, putative, expressed | GO:0008152 | metabolic process                                                     | P    |
|        | Os01g0199900 | LOC_Os01g10280 | phosphoribosylaminoimidazole carboxylase, chloroplast precursor, putative, expressed | GO:0000166 | nucleotide binding                                                    | F    |
|        | Os01g0199900 | LOC_Os01g10280 | phosphoribosylaminoimidazole carboxylase, chloroplast precursor, putative, expressed | GO:0003824 | catalytic activity                                                    | F    |
|        | Os01g0199900 | LOC_Os01g10280 | phosphoribosylaminoimidazole carboxylase, chloroplast precursor, putative, expressed | GO:0009058 | biosynthetic process                                                  | P    |
|        | Os01g0199900 | LOC_Os01g10280 | phosphoribosylaminoimidazole carboxylase, chloroplast precursor, putative, expressed | GO:0006139 | nucleobase, nucleoside, nucleotide and nucleic acid metabolic process | P    |
|        | Os01g0199900 | LOC_Os01g10280 | phosphoribosylaminoimidazole carboxylase, chloroplast precursor, putative, expressed | GO:0009536 | plastid                                                               | C    |
| qST1.2 | Os01g0200700 | LOC_Os01g10400 | No Plant GOSlim ID has been assigned for LOC_Os01g10400.1                            |            |                                                                       |      |
|        | Os01g0934900 | LOC_Os01g70860 | esterase, putative, expressed                                                        | GO:0016787 | hydrolase activity                                                    | F    |
|        | Os01g0934900 | LOC_Os01g70860 | esterase, putative, expressed                                                        | GO:0006950 | response to stress                                                    | P    |
|        | Os01g0934900 | LOC_Os01g70860 | esterase, putative, expressed                                                        | GO:0009607 | response to biotic stimulus                                           | P    |
|        | Os01g0934900 | LOC_Os01g70860 | esterase, putative, expressed                                                        | GO:0008152 | metabolic process                                                     | P    |
|        | Os01g0934900 | LOC_Os01g70860 | esterase, putative, expressed                                                        | GO:0009987 | cellular process                                                      | P    |
|        | Os01g0934900 | LOC_Os01g70860 | esterase, putative, expressed                                                        | GO:0006629 | lipid metabolic process                                               | P    |
|        | Os01g0941200 | LOC_Os01g71380 | glycosyl hydrolases family 17, putative, expressed                                   | GO:0006950 | response to stress                                                    | P    |
|        | Os01g0941200 | LOC_Os01g71380 | glycosyl hydrolases family 17, putative, expressed                                   | GO:0009607 | response to biotic stimulus                                           | P    |
|        | Os01g0941200 | LOC_Os01g71380 | glycosyl hydrolases family 17, putative, expressed                                   | GO:0008152 | metabolic process                                                     | P    |
|        | Os01g0941200 | LOC_Os01g71380 | glycosyl hydrolases family 17, putative, expressed                                   | GO:0003824 | catalytic activity                                                    | F    |
|        | Os01g0941200 | LOC_Os01g71380 | glycosyl hydrolases family 17, putative, expressed                                   | GO:0016020 | membrane                                                              | C    |
|        | Os01g0941200 | LOC_Os01g71380 | glycosyl hydrolases family 17, putative, expressed                                   | GO:0005773 | vacuole                                                               | C    |
|        |              |                |                                                                                      |            |                                                                       |      |
|        |              |                |                                                                                      |            |                                                                       |      |
|        |              |                |                                                                                      |            |                                                                       |      |

|      |              |                |                                                                    |            |                                                                       |   |
|------|--------------|----------------|--------------------------------------------------------------------|------------|-----------------------------------------------------------------------|---|
|      | Os01g0941200 | LOC_Os01g71380 | glycosyl hydrolases family 17, putative, expressed                 | GO:0016787 | hydrolase activity                                                    | F |
|      | Os01g0941200 | LOC_Os01g71380 | glycosyl hydrolases family 17, putative, expressed                 | GO:0005488 | binding                                                               | F |
|      | Os01g0941200 | LOC_Os01g71380 | glycosyl hydrolases family 17, putative, expressed                 | GO:0005618 | cell wall                                                             | C |
|      | Os01g0941200 | LOC_Os01g71380 | glycosyl hydrolases family 17, putative, expressed                 | GO:0009628 | response to abiotic stimulus                                          | P |
| qST2 | Os02g0674800 | LOC_Os02g45250 | homeobox and START domains containing protein, putative, expressed | GO:0005634 | nucleus                                                               | C |
|      | Os02g0674800 | LOC_Os02g45250 | homeobox and START domains containing protein, putative, expressed | GO:0009653 | anatomical structure morphogenesis                                    | P |
|      | Os02g0674800 | LOC_Os02g45250 | homeobox and START domains containing protein, putative, expressed | GO:0030154 | cell differentiation                                                  | P |
|      | Os02g0674800 | LOC_Os02g45250 | homeobox and START domains containing protein, putative, expressed | GO:0007275 | multicellular organismal development                                  | P |
|      | Os02g0674800 | LOC_Os02g45250 | homeobox and START domains containing protein, putative, expressed | GO:0009605 | response to external stimulus                                         | P |
|      | Os02g0674800 | LOC_Os02g45250 | homeobox and START domains containing protein, putative, expressed | GO:0009628 | response to abiotic stimulus                                          | P |
|      | Os02g0674800 | LOC_Os02g45250 | homeobox and START domains containing protein, putative, expressed | GO:0009058 | biosynthetic process                                                  | P |
|      | Os02g0674800 | LOC_Os02g45250 | homeobox and START domains containing protein, putative, expressed | GO:0006139 | nucleobase, nucleoside, nucleotide and nucleic acid metabolic process | P |
|      | Os02g0674800 | LOC_Os02g45250 | homeobox and START domains containing protein, putative, expressed | GO:0003700 | sequence-specific DNA binding transcription factor activity           | F |
| qST3 | Os03g0767800 | LOC_Os03g55850 | cold acclimation protein WCOR413, putative, expressed              | GO:0003674 | molecular_function                                                    | F |
|      | Os03g0767800 | LOC_Os03g55850 | cold acclimation protein WCOR413, putative, expressed              | GO:0016020 | membrane                                                              | C |
|      | Os03g0767800 | LOC_Os03g55850 | cold acclimation protein WCOR413, putative, expressed              | GO:0005773 | vacuole                                                               | C |
|      | Os03g0767800 | LOC_Os03g55850 | cold acclimation protein WCOR413, putative, expressed              | GO:0006950 | response to stress                                                    | P |
|      | Os03g0767800 | LOC_Os03g55850 | cold acclimation protein WCOR413, putative, expressed              | GO:0005886 | plasma membrane                                                       | C |
|      | Os03g0769050 | LOC_Os03g55920 | hydrolase, acting on carbon-nitrogen, putative, expressed          | GO:0003674 | molecular_function                                                    | F |
|      | Os03g0769050 | LOC_Os03g55920 | hydrolase, acting on carbon-nitrogen, putative, expressed          | GO:0008150 | biological_process                                                    | P |
|      | Os03g0769700 | LOC_Os03g55980 | expressed protein                                                  | GO:0003674 | molecular_function                                                    | F |
|      | Os03g0769700 | LOC_Os03g55980 | expressed protein                                                  | GO:0008150 | biological_process                                                    | P |
|      | Os03g0769700 | LOC_Os03g55980 | expressed protein                                                  | GO:0005886 | plasma membrane                                                       | C |
|      | Os03g0769800 | LOC_Os03g55990 | homeobox domain containing protein, expressed                      | GO:0003677 | DNA binding                                                           | F |

|              |                |                                                              |            |                                                                       |   |
|--------------|----------------|--------------------------------------------------------------|------------|-----------------------------------------------------------------------|---|
| Os03g0769800 | LOC_Os03g55990 | homeobox domain containing protein, expressed                | GO:0005634 | nucleus                                                               | C |
| Os03g0769800 | LOC_Os03g55990 | homeobox domain containing protein, expressed                | GO:0007275 | multicellular organismal development                                  | P |
| Os03g0769800 | LOC_Os03g55990 | homeobox domain containing protein, expressed                | GO:0009058 | biosynthetic process                                                  | P |
| Os03g0769800 | LOC_Os03g55990 | homeobox domain containing protein, expressed                | GO:0006139 | nucleobase, nucleoside, nucleotide and nucleic acid metabolic process | P |
| Os03g0769800 | LOC_Os03g55990 | homeobox domain containing protein, expressed                | GO:0009653 | anatomical structure morphogenesis                                    | P |
| Os03g0769800 | LOC_Os03g55990 | homeobox domain containing protein, expressed                | GO:0000003 | reproduction                                                          | P |
| Os03g0769800 | LOC_Os03g55990 | homeobox domain containing protein, expressed                | GO:0009791 | post-embryonic development                                            | P |
| Os03g0769800 | LOC_Os03g55990 | homeobox domain containing protein, expressed                | GO:0009790 | embryo development                                                    | P |
| Os03g0769800 | LOC_Os03g55990 | homeobox domain containing protein, expressed                | GO:0009908 | flower development                                                    | P |
| Os03g0769800 | LOC_Os03g55990 | homeobox domain containing protein, expressed                | GO:0003700 | sequence-specific DNA binding transcription factor activity           | F |
| Os03g0773150 | LOC_Os03g56241 | 40S ribosomal protein S29, putative, expressed               | GO:0005840 | ribosome                                                              | C |
| Os03g0773150 | LOC_Os03g56241 | 40S ribosomal protein S29, putative, expressed               | GO:0006412 | translation                                                           | P |
| Os03g0773150 | LOC_Os03g56241 | 40S ribosomal protein S29, putative, expressed               | GO:0005829 | cytosol                                                               | C |
| Os03g0773150 | LOC_Os03g56241 | 40S ribosomal protein S29, putative, expressed               | GO:0005198 | structural molecule activity                                          | F |
| Os03g0773600 | LOC_Os03g56260 | kinesin motor domain containing protein, putative, expressed | GO:0009987 | cellular process                                                      | P |
| Os03g0773600 | LOC_Os03g56260 | kinesin motor domain containing protein, putative, expressed | GO:0008152 | metabolic process                                                     | P |
| Os03g0773600 | LOC_Os03g56260 | kinesin motor domain containing protein, putative, expressed | GO:0000166 | nucleotide binding                                                    | F |
| Os03g0773600 | LOC_Os03g56260 | kinesin motor domain containing protein, putative, expressed | GO:0003774 | motor activity                                                        | F |
| Os03g0776000 | LOC_Os03g56460 | glucose-6-phosphate isomerase, putative, expressed           | GO:0003824 | catalytic activity                                                    | F |
| Os03g0776000 | LOC_Os03g56460 | glucose-6-phosphate isomerase, putative, expressed           | GO:0008150 | biological_process                                                    | P |
| Os03g0776000 | LOC_Os03g56460 | glucose-6-phosphate isomerase, putative, expressed           | GO:0006950 | response to stress                                                    | P |
| Os03g0776000 | LOC_Os03g56460 | glucose-6-phosphate isomerase, putative, expressed           | GO:0009607 | response to biotic stimulus                                           | P |
| Os03g0776000 | LOC_Os03g56460 | glucose-6-phosphate isomerase, putative, expressed           | GO:0008152 | metabolic process                                                     | P |
| Os03g0776000 | LOC_Os03g56460 | glucose-6-phosphate isomerase, putative, expressed           | GO:0009058 | biosynthetic process                                                  | P |

|      |              |                |                                                          |            |                                                |   |
|------|--------------|----------------|----------------------------------------------------------|------------|------------------------------------------------|---|
|      | Os03g0776000 | LOC_Os03g56460 | glucose-6-phosphate isomerase, putative, expressed       | GO:0005975 | carbohydrate metabolic process                 | P |
|      | Os03g0776000 | LOC_Os03g56460 | glucose-6-phosphate isomerase, putative, expressed       | GO:0009987 | cellular process                               | P |
|      | Os03g0776000 | LOC_Os03g56460 | glucose-6-phosphate isomerase, putative, expressed       | GO:0005829 | cytosol                                        | C |
|      | Os03g0776000 | LOC_Os03g56460 | glucose-6-phosphate isomerase, putative, expressed       | GO:0006091 | generation of precursor metabolites and energy | P |
|      | Os03g0776000 | LOC_Os03g56460 | glucose-6-phosphate isomerase, putative, expressed       | GO:0009056 | catabolic process                              | P |
| qST6 | Os06g0170500 | LOC_Os06g07350 | RNA-binding motif protein, putative, expressed           | GO:0003723 | RNA binding                                    | F |
|      | Os06g0170500 | LOC_Os06g07350 | RNA-binding motif protein, putative, expressed           | GO:0005634 | nucleus                                        | C |
|      | Os06g0170500 | LOC_Os06g07350 | RNA-binding motif protein, putative, expressed           | GO:0000166 | nucleotide binding                             | F |
|      | Os06g0170500 | LOC_Os06g07350 | RNA-binding motif protein, putative, expressed           | GO:0005488 | binding                                        | F |
|      | Os06g0170500 | LOC_Os06g07350 | RNA-binding motif protein, putative, expressed           | GO:0006950 | response to stress                             | P |
|      | Os06g0170500 | LOC_Os06g07350 | RNA-binding motif protein, putative, expressed           | GO:0009607 | response to biotic stimulus                    | P |
|      | Os06g0170500 | LOC_Os06g07350 | RNA-binding motif protein, putative, expressed           | GO:0003676 | nucleic acid binding                           | F |
|      | Os06g0171900 | LOC_Os06g07540 | WD-40 repeat family protein, putative, expressed         | GO:0005622 | intracellular                                  | C |
|      | Os06g0171900 | LOC_Os06g07540 | WD-40 repeat family protein, putative, expressed         | GO:0005886 | plasma membrane                                | C |
|      | Os06g0171900 | LOC_Os06g07540 | WD-40 repeat family protein, putative, expressed         | GO:0008150 | biological_process                             | P |
|      | Os06g0172800 | LOC_Os06g07600 | uncharacterized glycosyltransferase, putative, expressed | GO:0008152 | metabolic process                              | P |
|      | Os06g0172800 | LOC_Os06g07600 | uncharacterized glycosyltransferase, putative, expressed | GO:0005575 | cellular_component                             | C |
|      | Os06g0172800 | LOC_Os06g07600 | uncharacterized glycosyltransferase, putative, expressed | GO:0006950 | response to stress                             | P |
|      | Os06g0172800 | LOC_Os06g07600 | uncharacterized glycosyltransferase, putative, expressed | GO:0009628 | response to abiotic stimulus                   | P |
|      | Os06g0172800 | LOC_Os06g07600 | uncharacterized glycosyltransferase, putative, expressed | GO:0008150 | biological_process                             | P |
|      | Os06g0172800 | LOC_Os06g07600 | uncharacterized glycosyltransferase, putative, expressed | GO:0016787 | hydrolase activity                             | F |
|      | Os06g0172800 | LOC_Os06g07600 | uncharacterized glycosyltransferase, putative, expressed | GO:0009536 | plastid                                        | C |
|      | Os06g0177000 | LOC_Os06g07969 | cytochrome b-c1 complex subunit 8, putative, expressed   | GO:0016020 | membrane                                       | C |
|      | Os06g0177000 | LOC_Os06g07969 | cytochrome b-c1 complex subunit 8, putative, expressed   | GO:0006810 | transport                                      | P |
|      | Os06g0177000 | LOC_Os06g07969 | cytochrome b-c1 complex subunit 8, putative, expressed   | GO:0009987 | cellular process                               | P |

|       |              |                |                                                           |            |                                |   |
|-------|--------------|----------------|-----------------------------------------------------------|------------|--------------------------------|---|
|       | Os06g0177000 | LOC_Os06g07969 | cytochrome b-c1 complex subunit 8, putative, expressed    | GO:0003824 | catalytic activity             | F |
|       | Os06g0177000 | LOC_Os06g07969 | cytochrome b-c1 complex subunit 8, putative, expressed    | GO:0005215 | transporter activity           | F |
|       | Os06g0177000 | LOC_Os06g07969 | cytochrome b-c1 complex subunit 8, putative, expressed    | GO:0005739 | mitochondrion                  | C |
|       | Os06g0177000 | LOC_Os06g07969 | cytochrome b-c1 complex subunit 8, putative, expressed    | GO:0008152 | metabolic process              | P |
|       | Os06g0179000 | LOC_Os06g08090 | heparanase-like protein precursor, putative, expressed    | GO:0005618 | cell wall                      | C |
|       | Os06g0179000 | LOC_Os06g08090 | heparanase-like protein precursor, putative, expressed    | GO:0008152 | metabolic process              | P |
|       | Os06g0179000 | LOC_Os06g08090 | heparanase-like protein precursor, putative, expressed    | GO:0008150 | biological_process             | P |
|       | Os06g0179000 | LOC_Os06g08090 | heparanase-like protein precursor, putative, expressed    | GO:0016787 | hydrolase activity             | F |
| qST8  | Os08g0534350 | LOC_Os08g42210 | expressed protein                                         | GO:0003674 | molecular_function             | F |
|       | Os08g0534350 | LOC_Os08g42210 | expressed protein                                         | GO:0008150 | biological_process             | P |
|       | Os08g0535000 | LOC_Os08g42290 | expressed protein                                         | GO:0003674 | molecular_function             | F |
|       | Os08g0535000 | LOC_Os08g42290 | expressed protein                                         | GO:0008150 | biological_process             | P |
|       | Os08g0536200 | LOC_Os08g42430 | No Plant GOSlim ID has been assigned for LOC_Os08g42430.1 |            |                                |   |
|       | Os08g0539600 | LOC_Os08g42690 | ankyrin repeat domain containing protein, expressed       | GO:0019538 | protein metabolic process      | P |
|       | Os08g0539600 | LOC_Os08g42690 | ankyrin repeat domain containing protein, expressed       | GO:0009987 | cellular process               | P |
|       | Os08g0539600 | LOC_Os08g42690 | ankyrin repeat domain containing protein, expressed       | GO:0005634 | nucleus                        | C |
|       | Os08g0539600 | LOC_Os08g42690 | ankyrin repeat domain containing protein, expressed       | GO:0006810 | transport                      | P |
|       | Os08g0539600 | LOC_Os08g42690 | ankyrin repeat domain containing protein, expressed       | GO:0005737 | cytoplasm                      | C |
|       | Os08g0539600 | LOC_Os08g42690 | ankyrin repeat domain containing protein, expressed       | GO:0000003 | reproduction                   | P |
|       | Os08g0539600 | LOC_Os08g42690 | ankyrin repeat domain containing protein, expressed       | GO:0009791 | post-embryonic development     | P |
|       | Os08g0539600 | LOC_Os08g42690 | ankyrin repeat domain containing protein, expressed       | GO:0006950 | response to stress             | P |
|       | Os08g0539600 | LOC_Os08g42690 | ankyrin repeat domain containing protein, expressed       | GO:0009607 | response to biotic stimulus    | P |
|       | Os08g0539600 | LOC_Os08g42690 | ankyrin repeat domain containing protein, expressed       | GO:0008150 | biological_process             | P |
|       | Os08g0539600 | LOC_Os08g42690 | ankyrin repeat domain containing protein, expressed       | GO:0016020 | membrane                       | C |
|       | Os08g0539600 | LOC_Os08g42690 | ankyrin repeat domain containing protein, expressed       | GO:0009536 | plastid                        | C |
| qST10 | Os10g0478200 | LOC_Os10g33800 | lactate/malate dehydrogenase, putative, expressed         | GO:0003824 | catalytic activity             | F |
|       | Os10g0478200 | LOC_Os10g33800 | lactate/malate dehydrogenase, putative, expressed         | GO:0008152 | metabolic process              | P |
|       | Os10g0478200 | LOC_Os10g33800 | lactate/malate dehydrogenase, putative, expressed         | GO:0005575 | cellular_component             | C |
|       | Os10g0478200 | LOC_Os10g33800 | lactate/malate dehydrogenase, putative, expressed         | GO:0005975 | carbohydrate metabolic process | P |
|       | Os10g0478200 | LOC_Os10g33800 | lactate/malate dehydrogenase, putative, expressed         | GO:0006091 | generation of precursor        | P |

|       |              |                |                                                              |            |                                                |   |
|-------|--------------|----------------|--------------------------------------------------------------|------------|------------------------------------------------|---|
|       | Os10g0478200 | LOC_Os10g33800 | lactate/malate dehydrogenase, putative, expressed            | GO:0009056 | metabolites and energy catabolic process       | P |
|       | Os10g0478200 | LOC_Os10g33800 | lactate/malate dehydrogenase, putative, expressed            | GO:0009987 | cellular process                               | P |
|       | Os10g0478200 | LOC_Os10g33800 | lactate/malate dehydrogenase, putative, expressed            | GO:0005488 | binding                                        | F |
|       | Os10g0478200 | LOC_Os10g33800 | lactate/malate dehydrogenase, putative, expressed            | GO:0005829 | cytosol                                        | C |
|       | Os10g0478200 | LOC_Os10g33800 | lactate/malate dehydrogenase, putative, expressed            | GO:0005886 | plasma membrane                                | C |
|       | Os10g0478900 | LOC_Os10g33855 | No Plant GOSlim ID has been assigned for LOC_Os10g33855.1    |            |                                                |   |
|       | Os10g0481450 | LOC_Os10g34030 | zinc finger, C3HC4 type domain containing protein, expressed | GO:0003674 | molecular_function                             | F |
|       | Os10g0481450 | LOC_Os10g34030 | zinc finger, C3HC4 type domain containing protein, expressed | GO:0008150 | biological_process                             | P |
| qST11 | Os11g0210600 | LOC_Os11g10520 | dehydrogenase, putative, expressed                           | GO:0006950 | response to stress                             | P |
|       | Os11g0210600 | LOC_Os11g10520 | dehydrogenase, putative, expressed                           | GO:0009628 | response to abiotic stimulus                   | P |
|       | Os11g0210600 | LOC_Os11g10520 | dehydrogenase, putative, expressed                           | GO:0008152 | metabolic process                              | P |
|       | Os11g0210600 | LOC_Os11g10520 | dehydrogenase, putative, expressed                           | GO:0003824 | catalytic activity                             | F |
|       | Os11g0210600 | LOC_Os11g10520 | dehydrogenase, putative, expressed                           | GO:0008150 | biological_process                             | P |
|       | Os11g0210600 | LOC_Os11g10520 | dehydrogenase, putative, expressed                           | GO:0005829 | cytosol                                        | C |
|       | Os11g0210600 | LOC_Os11g10520 | dehydrogenase, putative, expressed                           | GO:0006091 | generation of precursor metabolites and energy | P |
|       | Os11g0210600 | LOC_Os11g10520 | dehydrogenase, putative, expressed                           | GO:0005886 | plasma membrane                                | C |
|       | Os11g0212100 | LOC_Os11g10620 | NBS-LRR disease resistance protein, putative, expressed      | GO:0005623 | cell                                           | C |
|       | Os11g0212100 | LOC_Os11g10620 | NBS-LRR disease resistance protein, putative, expressed      | GO:0000166 | nucleotide binding                             | F |
|       | Os11g0212100 | LOC_Os11g10620 | NBS-LRR disease resistance protein, putative, expressed      | GO:0006950 | response to stress                             | P |
|       | Os11g0213700 | LOC_Os11g10760 | NBS-LRR disease resistance protein, putative, expressed      | GO:0007165 | signal transduction                            | P |
|       | Os11g0213700 | LOC_Os11g10760 | NBS-LRR disease resistance protein, putative, expressed      | GO:0008152 | metabolic process                              | P |
|       | Os11g0213700 | LOC_Os11g10760 | NBS-LRR disease resistance protein, putative, expressed      | GO:0000166 | nucleotide binding                             | F |
|       | Os11g0213700 | LOC_Os11g10760 | NBS-LRR disease resistance protein, putative, expressed      | GO:0005623 | cell                                           | C |
|       | Os11g0213700 | LOC_Os11g10760 | NBS-LRR disease resistance protein, putative, expressed      | GO:0016020 | membrane                                       | C |
|       | Os11g0213700 | LOC_Os11g10760 | NBS-LRR disease resistance protein, putative, expressed      | GO:0006950 | response to stress                             | P |
|       | Os11g0213700 | LOC_Os11g10760 | NBS-LRR disease resistance protein, putative, expressed      | GO:0004872 | receptor activity                              | F |

|       |              |                |                                                         |            |                                      |   |
|-------|--------------|----------------|---------------------------------------------------------|------------|--------------------------------------|---|
|       | Os11g0213700 | LOC_Os11g10760 | NBS-LRR disease resistance protein, putative, expressed | GO:0004871 | signal transducer activity           | F |
|       | Os11g0213700 | LOC_Os11g10760 | NBS-LRR disease resistance protein, putative, expressed | GO:0016787 | hydrolase activity                   | F |
|       | Os11g0213800 | LOC_Os11g10770 | disease resistance protein RGA3, putative, expressed    | GO:0005515 | protein binding                      | F |
|       | Os11g0213800 | LOC_Os11g10770 | disease resistance protein RGA3, putative, expressed    | GO:0006950 | response to stress                   | P |
|       | Os11g0215100 | LOC_Os11g10870 | dirigent, putative, expressed                           | GO:0005623 | cell                                 | C |
|       | Os11g0215100 | LOC_Os11g10870 | dirigent, putative, expressed                           | GO:0003674 | molecular_function                   | F |
|       | Os11g0215100 | LOC_Os11g10870 | dirigent, putative, expressed                           | GO:0009058 | biosynthetic process                 | P |
|       | Os11g0215100 | LOC_Os11g10870 | dirigent, putative, expressed                           | GO:0006464 | protein modification process         | P |
|       | Os11g0215100 | LOC_Os11g10870 | dirigent, putative, expressed                           | GO:0006950 | response to stress                   | P |
|       | Os11g0215100 | LOC_Os11g10870 | dirigent, putative, expressed                           | GO:0009987 | cellular process                     | P |
|       | Os11g0215100 | LOC_Os11g10870 | dirigent, putative, expressed                           | GO:0019748 | secondary metabolic process          | P |
|       | Os11g0217300 | LOC_Os11g11060 | GHMP kinases ATP-binding protein, putative, expressed   | GO:0008152 | metabolic process                    | P |
|       | Os11g0217300 | LOC_Os11g11060 | GHMP kinases ATP-binding protein, putative, expressed   | GO:0009987 | cellular process                     | P |
|       | Os11g0217300 | LOC_Os11g11060 | GHMP kinases ATP-binding protein, putative, expressed   | GO:0000166 | nucleotide binding                   | F |
|       | Os11g0217300 | LOC_Os11g11060 | GHMP kinases ATP-binding protein, putative, expressed   | GO:0009856 | pollination                          | P |
|       | Os11g0217300 | LOC_Os11g11060 | GHMP kinases ATP-binding protein, putative, expressed   | GO:0007275 | multicellular organismal development | P |
|       | Os11g0217300 | LOC_Os11g11060 | GHMP kinases ATP-binding protein, putative, expressed   | GO:0005975 | carbohydrate metabolic process       | P |
|       | Os11g0217300 | LOC_Os11g11060 | GHMP kinases ATP-binding protein, putative, expressed   | GO:0016301 | kinase activity                      | F |
|       | Os11g0217300 | LOC_Os11g11060 | GHMP kinases ATP-binding protein, putative, expressed   | GO:0005829 | cytosol                              | C |
|       | Os11g0217300 | LOC_Os11g11060 | GHMP kinases ATP-binding protein, putative, expressed   | GO:0003723 | RNA binding                          | F |
| qST12 | Os12g0625000 | LOC_Os12g42980 | cysteine synthase, putative, expressed                  | GO:0016020 | membrane                             | C |
|       | Os12g0625000 | LOC_Os12g42980 | cysteine synthase, putative, expressed                  | GO:0005576 | extracellular region                 | C |
|       | Os12g0625000 | LOC_Os12g42980 | cysteine synthase, putative, expressed                  | GO:0005634 | nucleus                              | C |
|       | Os12g0625000 | LOC_Os12g42980 | cysteine synthase, putative, expressed                  | GO:0003824 | catalytic activity                   | F |
|       | Os12g0625000 | LOC_Os12g42980 | cysteine synthase, putative, expressed                  | GO:0005777 | peroxisome                           | C |
|       | Os12g0625000 | LOC_Os12g42980 | cysteine synthase, putative, expressed                  | GO:0008150 | biological_process                   | P |
|       | Os12g0625000 | LOC_Os12g42980 | cysteine synthase, putative, expressed                  | GO:0005773 | vacuole                              | C |
|       | Os12g0625000 | LOC_Os12g42980 | cysteine synthase, putative, expressed                  | GO:0005515 | protein binding                      | F |
|       | Os12g0625000 | LOC_Os12g42980 | cysteine synthase, putative, expressed                  | GO:0009058 | biosynthetic process                 | P |
|       | Os12g0625000 | LOC_Os12g42980 | cysteine synthase, putative, expressed                  | GO:0009987 | cellular process                     | P |

|              |                |                                                          |            |                                 |   |
|--------------|----------------|----------------------------------------------------------|------------|---------------------------------|---|
| Os12g0625000 | LOC_Os12g42980 | cysteine synthase, putative,<br>expressed                | GO:0005829 | cytosol                         | C |
| Os12g0625000 | LOC_Os12g42980 | cysteine synthase, putative,<br>expressed                | GO:0005886 | plasma membrane                 | C |
| Os12g0625000 | LOC_Os12g42980 | cysteine synthase, putative,<br>expressed                | GO:0009536 | plastid                         | C |
| Os12g0630200 | LOC_Os12g43450 | thaumatin family domain<br>containing protein, expressed | GO:0005623 | cell                            | C |
| Os12g0630200 | LOC_Os12g43450 | thaumatin family domain<br>containing protein, expressed | GO:0006950 | response to stress              | P |
| Os12g0630200 | LOC_Os12g43450 | thaumatin family domain<br>containing protein, expressed | GO:0009607 | response to biotic<br>stimulus  | P |
| Os12g0630200 | LOC_Os12g43450 | thaumatin family domain<br>containing protein, expressed | GO:0009628 | response to abiotic<br>stimulus | P |
